# Supplementary material for: Analysis of the Expression and Subcellular Distribution of eEF1A1 and eEF1A2 mRNAs during Neurodevelopment
Source: MDPI journal article supplement (doi:10.3390/cells11121877), 2022-06-09
Supplement: s1 [file s1]

Figure S1

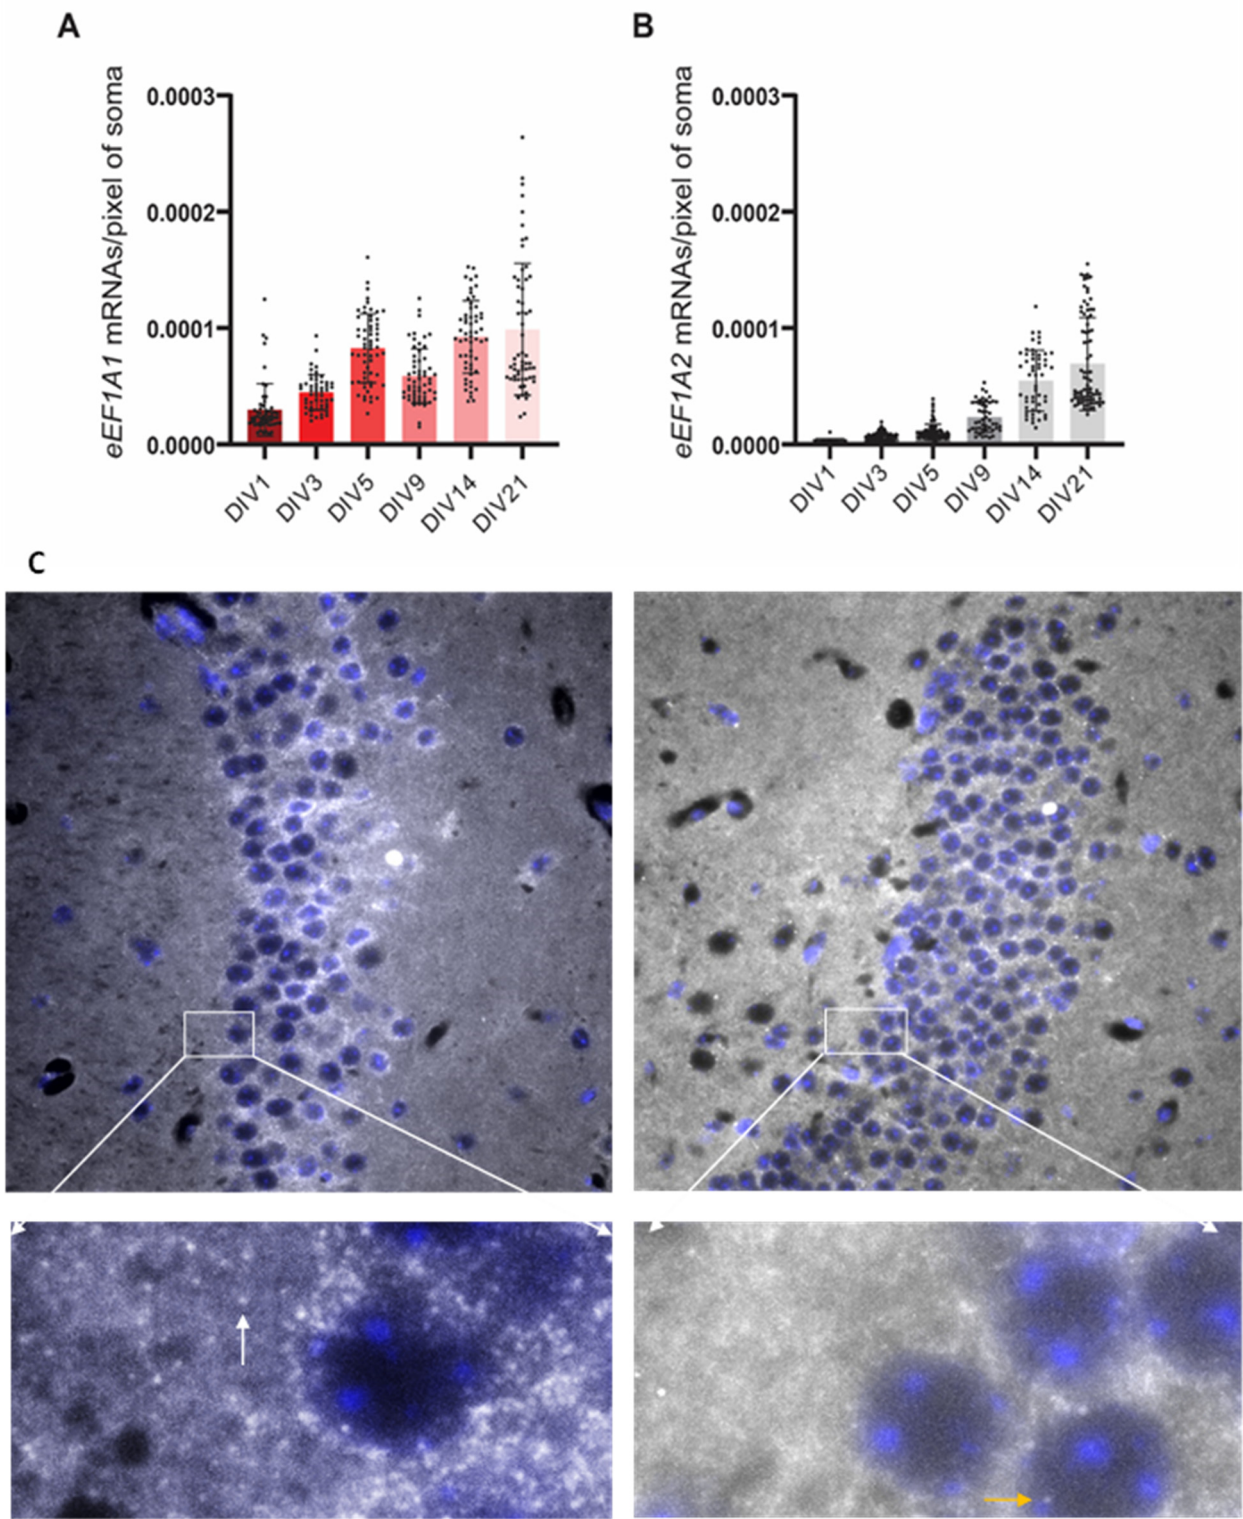

D

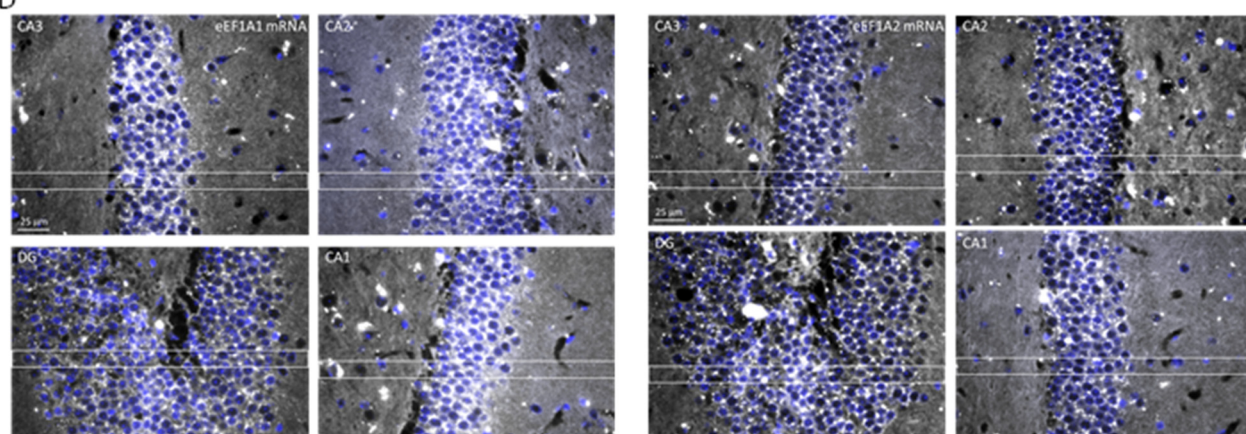

eEF1A1

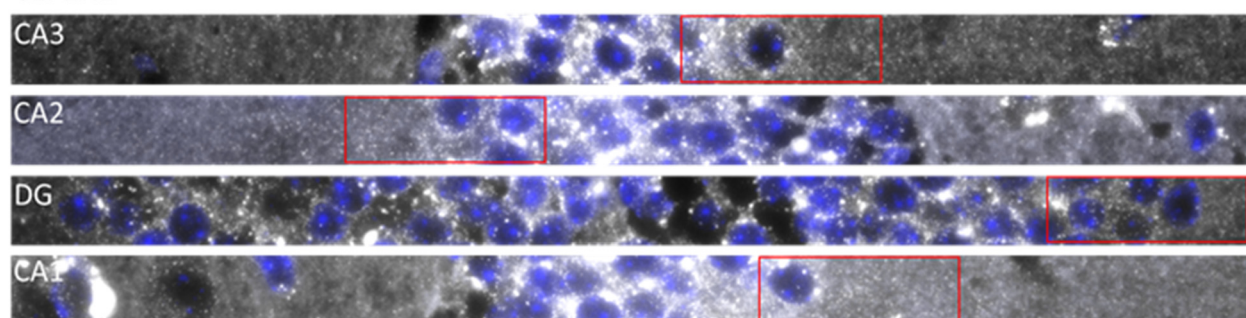

eEF1A2

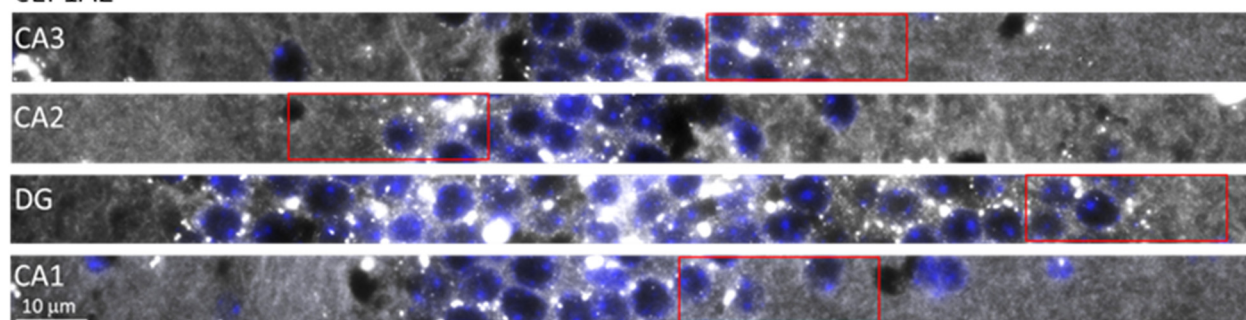



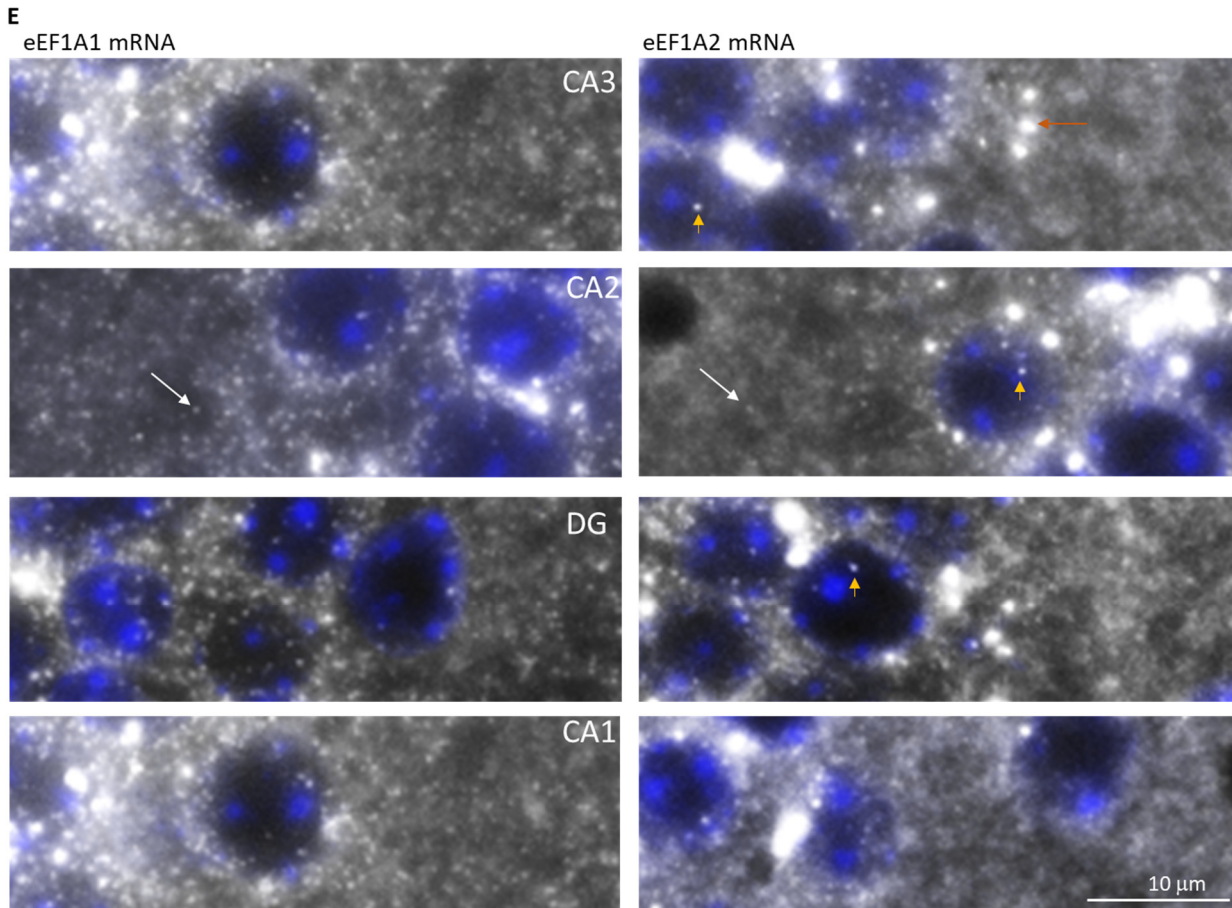

**Figure S1.** *eEF1A1* and *eEF1A2* mRNA localization in the dendrites through neurodevelopment

**A-B.** Density of mature *eEF1A1* (B) and *eEF1A2* (C) mRNAs per soma expressed as number of mRNAs per pixel of soma through neurodevelopment. **C-.** Tissue smFISH detects *eEF1A1* and *eEF1A2* mRNAs in the the hippocampus of 6-week-old mouse. Images were taken with a 60x objective, and the indicated cell area is magnified to show single mRNA molecules (white arrow points to a representative molecule) and transcription sites (yellow arrow points to a representative TS). **D-E.** Tissue smFISH detects *eEF1A1* and *eEF1A2* mRNAs in neurons of the hippocampus of 6-week-old mouse. Images were taken with a 60x objective, and the indicated area is magnified to show single mRNA molecules (white arrow points to a representative molecule) and transcription sites (yellow arrow points to a representative TS) in neurons. Blue is nucleus stained with DAPI. **D-E.** Tissue smFISH detects *eEF1A1* and *eEF1A2* mRNAs in neurons of the indicated regions of the hippocampus of 90-week-old mice. Images were taken with a 60x objective, and the indicated white rectangle is magnified to show single mRNA molecules across the tissue section in the soma and neurite areas (**D**). These sections are furthered magnified in **E** to show single mRNAs (white arrows), TSs (yellow arrows) and autofluorescence aggregates (orange arrows) that were more prevalent in 90 than 6-week-old mouse. Blue, nucleus stained with DAPI.

## X. Appendix SA. Code information/ Program Layout

ARLIN (Analysis of RNA Localization In Neurons) is a program is composed of 6 modules, two of which are executable, part1.py and part2.py. Both Part 1 and Part 2 draw from ui.py and segmentation.py. **Fig. 1D** describes the purpose of each module and the module dependencies.

### Part 1

#### *Terminology:*

A **print** is a 2D binary image for a specified cellular compartment, where there is a white pixel where the cellular exists and a black pixel everywhere else

A **skeleton** is a 2D binary image of a single white line representing the midline of a print for a dendrite

**MAP2** is an immunofluorescence using an antibody that detects the Microtubule associate protein 2 (Map2) which localizes in dendrites

**DAPI** (4',6-diamidino-2-phenylindole) is a blue-fluorescent DNA stain used to identify nuclei

#### *Generating prints*

Representative Image of prints is provided in **Figure 1D**. For dendrites, the program will look at each color used to annotate a dendrite in the annotation image and uses that color block as a mask for the 2D projection of the MAP2 Image. In other words, the program extracts the map2 signal colored over by the annotation, and it does so separately for each dendrite. This MAP2 signal is subsequently binarized using the Otsu threshold generated from the original unmasked 2D MAP2 Image. Thus, we obtain a binary image for each dendrite which is cleaned, smoothed, and then passed through an algorithm to account for inconsistent MAP2 signal.

Since synapses protrude out of dendrites, often the synapses are not contained by the Map2 stain, and thus also not contained by the dendrite prints. To account for this, when analyzing synapses, Part 1 of our program generates two prints for each dendrite, a regular one and another which is slightly dilated so that it contains all synaptic protrusions.

Because somas are easy to annotate accurately, when generating prints for somas, the program simply uses the masks generated from the annotations as a print. Thus, no binarizing is necessary, and only minimal cleaning is required to smooth the edges of the print.

For nuclei, the program will look at each color used to annotate a soma as a mask on the 2D projection of the DAPI channel. So, the program isolates the nuclei associated with each soma. The masked Image is then binarized using a scaled Otsu threshold of the 2D DAPI image. Qualitatively, we found that scaling the threshold down by 0.65 worked best. DAPI stains tend to be stronger around the perimeter of the nucleus and spotty in the center, so once a binary image of each nucleus is obtained, it is cleaned, by filling in holes and smoothing edges.

### Algorithm for inconsistent signal

The MAP2 stain for dendrites varies in intensity even along the same dendrite. To obtain connected prints for each dendrite we merge fragments of the dendrite print with the following algorithm:

Input: 2D projection of a dendrite binarized by Otsu threshold

Algorithm:

- Save a copy of the input
- Obtain an over-dilated dendrite by dilating every pixel by a radius of 4 and then erode every pixel by a radius of 3 until all the white pixels in the Image are part of 1 connected component
- Skeletonize the over-dilated dendrite
- Dilate the skeleton by a 5-pixel radius
- Add the dilated skeleton to the copy of the original input and obtain the final print

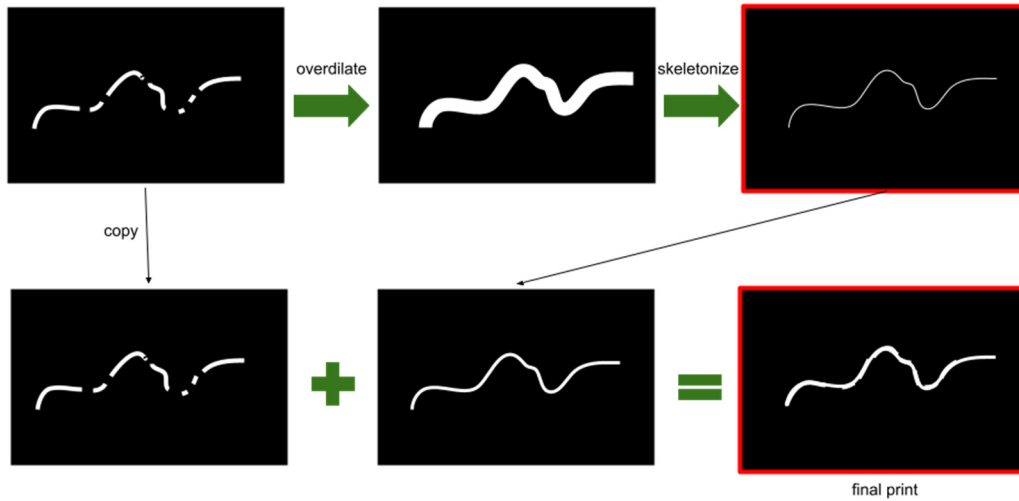

**Figure S2.** Schematic of the algorithm for inconsistent MAP2 signal

We choose to dilate by a radius of 4 pixels and erode by a radius of 3 pixel because it both smooths the edge of the Image while also having the net effect of dilating each pixel in the dendrite by a radius of 1. Also note that because the dendrite is over-dilated by expanding each pixel equally in all directions, the midline (ie skeleton) of the original input should not be greatly affected by the algorithm.

### Trimming Skeletons

Initial skeletons are obtained using the `skimage.skeletonize` function. However, sometimes these original skeletons have some small branches. To trim these branches, use the `FilFinder` library to extract the part of the skeleton corresponding to the longest path. Additionally, the initial skeletons on occasion contain small circle or line segments disjoint from the main skeleton. In these cases, our `CleanBinaryImage` function is applied, which keeps only the largest component of the skeleton image.

### *Cleaning Binary Images*

Even though every dendrite print is passed through the algorithm for inconsistent signal the final prints may still have white blobs which are disjoint from the main print. This can happen when the saved copy of the original dendrite print captures a signal that is noise and not from the dendrite. So even though the algorithm for inconsistent signal dilates the print into 1 connected component, when the skeleton is added back to the saved copy, the extraneous white blobs are still present.

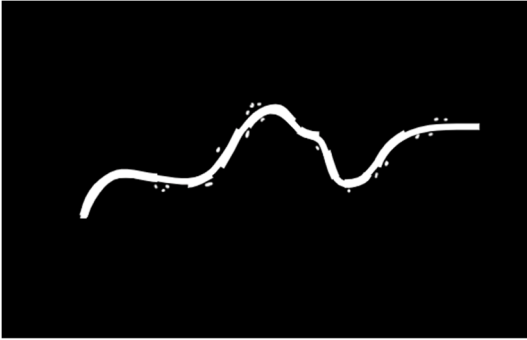

**Figure S3.** Example noisy signal spots surrounding print after applying the algorithm for inconsistent signal

This issue is accounted for with a function for cleaning binary images, named `CleanBinaryImage`. This function looks at every connected component in the print and deletes all components except for the one with the largest area. However, it first checks that the second-largest component has an area smaller than 20% of the area of the largest component. If the print does not pass this requirement, it is evidence that there is an abnormally large extraneous signal or that something else has gone wrong in the generation of the print. In this case, the program will not delete any small blobs from the print, will report the problem to the user, and will not add this dendrite to any of the outline files.

Note the program also contains a similar function for refining soma and nucleus prints, named `refineSomaOrNucPrint` which calls the `Clean Binary Image` function. Because DAPI stains tend to be spotty at center of the nucleus, in addition to deleting small white blobs the program also fills in holes

### *Saving Skeletons and Prints*

All prints and skeletons are saved as black and white gif images in a folder called `SkeletonsAndPrints`, so that they can be accessed by the second part of the program.

### *FISHQuant*

`FISHQuant` is a program that searches `smFISH` images for Gaussian distributions of signals to detect mRNAs (Mueller et al., 2013). Furthermore, the program can distinguish between multiple mRNA spots if their signals overlap, making it particularly useful for counting the number of mRNAs in transcription sites. We use version one of `FISHQuant`, which is written in Matlab, to find the coordinates of all the mRNA in each dendrite and soma.

## Part 2

This part of the pipeline can be used to extract different information and statistics from the mRNA/synapse coordinates and dendrite morphology to provide insights for different biological questions.

Currently functionalities include finding:

1. Density of mRNAs within each dendrite and soma under different experimental conditions
2. Distribution of mRNAs along the dendrites based on how far they travel from the soma
3. Colocalization of different mRNA species based on how far each mRNA is from its closest mRNA from the other species
4. Colocalization of mRNAs with synapses based on how many mRNAs are within a threshold distance from each synapse

## Input Extraction

We first parse the information in the text files generated by performing spot detect in FISHQuant which records the coordinates of every mRNA and synapse. Thus, we first extract all the coordinates and which dendrite or soma they came from. It should be noted that the output of FISHQuant's spot detection function flips the x and y coordinates. We account for this in our own program.

```
FISH-QUANT
File-version      3D_v1
RESULTS OF SPOT DETECTION PERFORMED ON 17-Aug-2021
COMMENT Automated outline definition (batch or quick-save)
IMG_Raw 21-08-07_DIV14_MG132_HSP8HSP110MAP2Tau_001_xy6_CYS.tif
IMG_Filtered 21-08-07_DIV14_MG132_HSP8HSP110MAP2Tau_001_xy6_CYS_filtered_batch.tif
IMG_DAPI 21-08-07_DIV14_MG132_HSP8HSP110MAP2Tau_001_xy6_DAPI.tif
IMG_TS_label
FILE_settings    FQ_batch_settings_MATURE_210817.txt
PARAMETERS
Pix-X Pix-Z
107.5 300
CELL_START
X_POS 1146 1136 1136 1136 1142 1148 1152 1156 1160 1164 1167 1170 1174 1177 1182 1186 1191 1196 1200 1205
1208 1211 1215 1219 1223 1226 1230 1233 1237 1241 1246 1251 1255 1259 1263 1267 1272 1279 1286 1293 1299
1304 1309 1315 1321 1327 1334 1340 1346 1357 1362 1368 1377 1385 1386 1385 1384 1383 1381 1380 1381 1382
1384 1387 1391 1394 1397 1401 1406 1412 1422 1431 1430 1426 1422 1420 1416 1413 1410 1408 1407 1407 1409
1410 1411 1412 1412 1411 1408 1400 1392 1395 1391 1381 1371 1365 1359 1355 1351 1345 1336 1330 1325 1320
1313 1306 1299 1293 1289 1285 1281 1277 1272 1267 1262 1258 1255 1251 1248 1245 1241 1237 1233 1227 1223
1218 1216 1212 1208 1203 1199 1196 1193 1189 1186 1182 1177 1171 1163 1157 1150 1149 1499 1489 1479 1469 1459 1449
Y_POS 1632 1628 1618 1608 1598 1589 1579 1569 1559 1549 1539 1529 1519 1509 1499 1489 1479 1469 1459 1449
1439 1429 1419 1409 1399 1389 1379 1370 1360 1350 1340 1330 1320 1310 1300 1290 1280 1270 1260 1250 1240
1230 1220 1210 1200 1190 1180 1170 1160 1150 1140 1130 1120 1110 1100 1090 1080 1070 1060 1050 1040 1030
1020 1010 1000 990 980 970 960 950 940 930 920 910 900 890 880 870 860 850 840 830 820 810 800
1074 1064 1054 1044 1034 1024 1014 1004 994 984 974 964 954 944 934 924 914 904 894 884 874 864 854 844
1268 1278 1288 1298 1308 1318 1328 1338 1348 1358 1368 1378 1388 1398 1408 1418 1428 1438 1448 1458 1468 1478 1488 1498
1477 1487 1497 1507 1517 1527 1537 1547 1557 1567 1577 1587 1597 1607 1617
Z_POS
CELL_END
SPOTS_START
Pos_Y Pos_X Pos_Z AMP BGD RES SigmaX SigmaY SigmaZ Cent_Y Cent_X Cent_Z MuY MuX MuZ ITERY_det Y_det X_det Z_det Y_min
Y_max X_min X_max Z_min INT_raw INT_filt SC_det SC_det_norm TH_det TH_fit IN_nuc
101690 152514 2908.29 1835.32 2167.74 1.27729e+07 145.371 145.371 469.374 212.892 217.42 935.074 209.894 186.569 1108.29 19 947 1420 10 945 949
1418 1422 7 13 4048 1568 384.017 0.78652 1 1 -1 208.394 217.423 863.847 147.054 230.446 566.551 13 949 1423 20 947 951
101842 152880 5366.55 1144.3 1087.19 3.90548e+06 177.385 177.385 734.614 212.796 227.612 910.361 210.421 285.804 1000.86 13 952 1417 15 950 954
1421 1425 17 23 3152 1083 221.998 0.390037 1 1 -1 210.313 213.853 911.432 182.49 181.256 866.418 13 953 1422 16 951 955
102228 152291 4300.86 1503.02 1500.37 5.52946e+06 176.124 176.124 629.87 211.809 227.703 885.021 197.023 294.936 824.498 17 956 1417 19 954 958
1415 1419 12 18 3124 1357 282.687 0.520092 1 1 -1 211.716 217.407 900.037 203.269 214.236 1082.52 12 956 1422 20 954 958
102307 152724 4466.42 1045.38 1932.88 4.18547e+06 120.941 120.941 446.139 216.2 228.433 892.006 213.814 329.784 939.351 10 959 1430 14 957 961
1420 1424 13 19 2972 919 172.12 0.316669 1 1 -1 203.885 221.875 978.115 106.338 294.218 1762.77 12 960 1430 10 958 962
102645 152300 5324.5 1358.95 1150.66 5.64583e+06 221.167 221.167 868.026 211.809 227.703 885.021 197.023 294.936 824.498 17 956 1417 19 954 958
1415 1419 16 22 3038 1399 243.953 0.448829 1 1 -1 211.716 217.407 900.037 203.269 214.236 1082.52 12 956 1422 20 954 958
102651 152757 5882.52 1303.38 1931.89 3.69842e+06 99.0517 99.0517 421.017 211.716 217.407 900.037 203.269 214.236 1082.52 12 956 1422 20 954 958
1420 1424 17 23 2973 1020 218.634 0.482246 1 1 -1 211.716 217.407 900.037 203.269 214.236 1082.52 12 956 1422 20 954 958
102758 153186 5077.13 1181.59 1826.66 2.81195e+06 162.434 162.434 455.275 223.315 214.826 901.768 310.716 213.25 877.132 9 956 1426 18 954 958
1424 1428 15 21 3065 990 196.358 0.361263 1 1 -1 216.2 228.433 892.006 213.814 329.784 939.351 10 959 1430 14 957 961
102984 153732 3939.35 1490.67 2173.04 8.49488e+06 142.274 142.274 976.877 216.2 228.433 892.006 213.814 329.784 939.351 10 959 1430 14 957 961
1428 1432 11 17 3817 1353 369.906 0.680558 1 1 -1 203.885 221.875 978.115 106.338 294.218 1762.77 12 960 1430 10 958 962
102984 153697 3562.77 1717.4 1477.84 5.96186e+06 266.092 266.092 1111.04 203.885 221.875 978.115 106.338 294.218 1762.77 12 960 1430 10 958 962
1428 1432 13 19 3262 962 300.933 0.55366 1 1 -1 203.885 221.875 978.115 106.338 294.218 1762.77 12 960 1430 10 958 962
103283 153245 5912.66 1295.31 1878.27 1.31519e+07 199.973 199.973 583.651 209.4 209.633 926.882 190.392 165.183 1112.66 15 962 1427 20 960 964
1425 1429 17 23 3406 1346 354.786 0.65274 1 1 -1 222.873 236.848 884.348 251.644 313.366 813.919 13 963 1413 14 961 965
103452 151888 3813.92 1331.32 952.534 2.81769e+06 162.15 162.15 742.932 222.873 236.848 884.348 251.644 313.366 813.919 13 963 1413 14 961 965
1411 1415 11 17 2367 1068 223.562 0.411313 1 1 -1 210.296 220.527 863.1 187.068 246.673 655.579 14 966 1418 21 964 968
103710 152359 5755.58 1103.05 1296.57 2.49922e+06 154.354 154.354 677.837 210.296 220.527 863.1 187.068 246.673 655.579 14 966 1418 21 964 968
1416 1420 18 24 2573 1132 210.045 0.386443 1 1 -1 216.332 222.509 903.197 219.989 250.038 916.452 11 967 1414 11 965 969
103850 151933 3016.45 1359.84 1269.04 4.57739e+06 149.311 149.311 596.772 216.332 222.509 903.197 219.989 250.038 916.452 11 967 1414 11 965 969
```

**Figure S4.** Example of output file from FISHQuant. The x and y coordinates of the mRNA or synapse signals are extracted for analysis.

## Calculating Density

To calculate the area of a dendrite or soma, the program counts the number of pixels in the corresponding print generated from part 1. The area in pixels can then be converted to squared



nanometers (nm<sup>2</sup>) based on the conversion factor specific to each microscope. We then can take the ratio of the number of mRNA in and the area of each dendrite/soma to obtain compartment-specific mRNA density.

| Number | Channel | Number of mRNA | Area (sq. nanometer) | Density               |
|--------|---------|----------------|----------------------|-----------------------|
| 3      | CY3     | 36             | 2808168.75           | 0.0000128197424033011 |
| 3      | CY5     | 36             | 2808168.75           | 0.0000128197424033011 |
| 4      | CY3     | 36             | 2657937.5            | 0.0000135443365391398 |
| 4      | CY5     | 36             | 2657937.5            | 0.0000135443365391398 |
| 6      | CY3     | 36             | 2877506.25           | 0.0000125108329477999 |
| 6      | CY5     | 36             | 2877506.25           | 0.0000125108329477999 |
|        |         |                |                      |                       |
|        |         |                |                      |                       |
|        |         |                |                      |                       |

**Figure S5.** Example of compartment-specific mRNA count, area (in pixels) and mRNA density.

#### *Finding the Endpoints of Dendritic Skeleton*

To find the two endpoints of the skeleton, the program looks at the neighbors of each white pixel in the skeleton. If a skeleton point is an endpoint, only one of its neighboring pixels will be white, while all other points in the skeleton will have two neighboring white pixels. Since the skeleton can have a curved structure, the neighboring points of a skeleton point can be anywhere inside a 3 by 3 grid centered at the skeleton point of interest. As a result, the program counts the number of white pixels in a 3 by 3 grid centered at each point in the skeleton. If there are 3 white pixels in the grid, the point of interest is considered to not be an endpoint. If there are only 2 white pixels, the skeleton point centered is an endpoint.

If the program finds less than 2 or more than 2 endpoints for a particular skeleton it is an indicator that the outline for this dendrite was not generated properly. In this case, the program will not include the dendrite associated with the skeleton in the statistical analysis.

#### *Determine the Soma Endpoint*

Once two endpoints of the skeleton are found, the program aims to determine which of the two endpoints belongs to the soma end. Since dendritic annotation does not keep track of the soma end, the program needs to determine it using available information. With thousands of images from previous smFISH experiments, it has been observed that the soma end of each dendrite almost always has more mRNAs than the distal end. Biologically, this observation can be explained by the fact that the transportation of mRNAs out of the soma is limited. Thus, we assume that the end of the dendrite with more mRNA is the end closer to the soma.

#### *Distance of mRNA to soma*

To find how far the mRNAs are from the soma, the program first projects each mRNA to the closest pixel on the skeleton. Then it counts the number of pixels along the skeleton from the soma endpoint to the projected mRNA. As we count pixels along the skeleton, we keep track if an adjacent or



diagonal pixel step was taken, so that we can calculate the precise distance of each step ( $\sqrt{2}$  for a diagonal step and 1, for an adjacent step). Note that the distance along the skeleton from an mRNA to an endpoint is more accurate than the Euclidean distance because it considers the curved morphology of the dendrite. Since the skeleton is the center axis of the dendrite, the skeleton and dendrite share the same curvature. The calculated distances are then binned into groups of 25 micrometers before being written to an excel file.

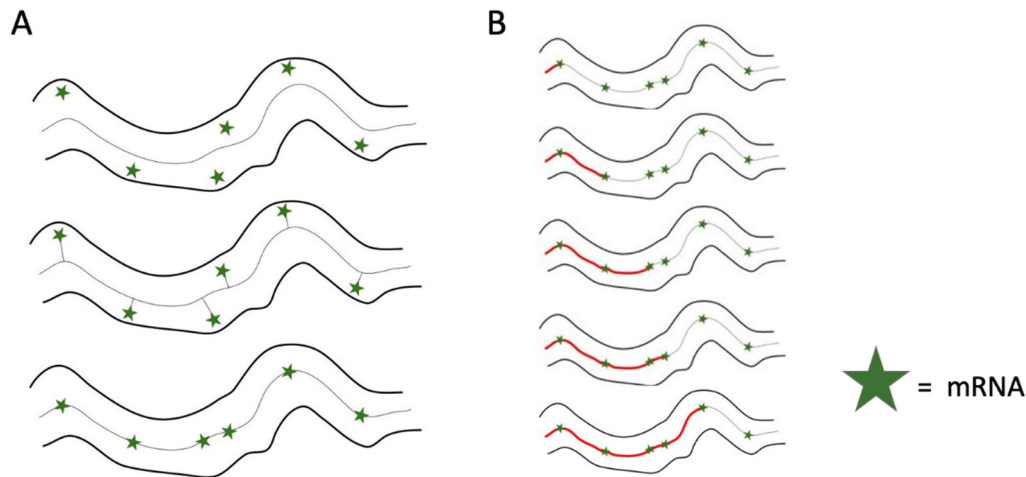

**Figure S6.** A) Diagram of mapping mRNA spot coordinates to the skeleton B) Measuring distance of mRNA to soma by counting pixels along the skeleton

| Dendrite Num | Channel | 0-25 (um) | 25-50 (um) | 50-75 (um) | 75-100 (um) | 100-125 (um) | 125-150 (um) | >= 150 (um) |
|--------------|---------|-----------|------------|------------|-------------|--------------|--------------|-------------|
| 1            | Cy3     | 89        | 35         | 33         | 32          | 35           | 22           | 0           |
| 1            | Cy5     | 47        | 9          | 8          | 13          | 10           | 6            | 0           |
| 2            | Cy3     | 52        | 36         | 42         | 2           | 0            | 0            | 0           |
| 2            | Cy5     | 45        | 16         | 12         | 0           | 0            | 0            | 0           |
| 3            | Cy3     | 67        | 40         | 26         | 48          | 2            | 0            | 0           |
| 3            | Cy5     | 61        | 25         | 13         | 25          | 0            | 0            | 0           |
| 4            | Cy3     | 110       | 0          | 0          | 0           | 0            | 0            | 0           |
| 4            | Cy5     | 68        | 0          | 0          | 0           | 0            | 0            | 0           |
| 5            | Cy3     | 90        | 64         | 68         | 71          | 55           | 0            | 0           |
| 5            | Cy5     | 51        | 40         | 26         | 35          | 32           | 0            | 0           |
| 6            | Cy3     | 74        | 43         | 34         | 30          | 31           | 16           | 0           |
| 6            | Cy5     | 38        | 14         | 13         | 4           | 9            | 3            | 0           |
| 7            | Cy3     | 59        | 36         | 35         | 0           | 0            | 0            | 0           |
| 7            | Cy5     | 52        | 20         | 10         | 0           | 0            | 0            | 0           |
| 8            | Cy3     | 181       | 0          | 0          | 0           | 0            | 0            | 0           |
| 8            | Cy5     | 96        | 0          | 0          | 0           | 0            | 0            | 0           |
| 9            | Cy3     | 101       | 69         | 49         | 30          | 4            | 0            | 0           |
| 9            | Cy5     | 73        | 26         | 12         | 5           | 1            | 0            | 0           |

**Figure S7.** Example of mRNA distribution based on the distance to soma along with the skeleton; each dendrite is assigned a unique number

### *mRNA Colocalization Statistics*

Our motivation for calculating colocalization statistics for two kinds of mRNA is to see if the mRNAs are moving together down the dendrites in granules. The program will loop through every mRNA of species A and find the distance to the closest mRNA of species B. The same calculation can be done the other way around, finding the distance between each mRNA of species B to the closest mRNA of species A. Additionally, the program calculates self-colocalization, the distance

between an mRNA of species A to another mRNA of species A (not including itself). To have a computational control, the same colocalization statistics were calculated with simulated mRNA coordinates. The simulation process is described below in the section “Simulation as Control.” Nearest distances are then binned into user-defined groups before being written to an excel file.

| Distance (nm) | Cy3 to closest Cy5 | Cy5 to closest Cy3 | Cy3 to closest Cy3 | Cy5 to closest Cy5 | Sim-Cy3 to closest Sim-Cy5 | Sim-Cy5 to closest Sim-Cy3 |
|---------------|--------------------|--------------------|--------------------|--------------------|----------------------------|----------------------------|
| 0-75          | 487                | 489                | 94                 | 109                | 0                          | 0                          |
| 75-150        | 1172               | 1190               | 387                | 359                | 0                          | 0                          |
| 150-225       | 1216               | 1198               | 710                | 550                | 0                          | 0                          |
| 225-300       | 1203               | 1113               | 988                | 671                | 0                          | 0                          |
| 300-375       | 792                | 655                | 1183               | 628                | 0                          | 0                          |
| 375-450       | 516                | 308                | 1191               | 643                | 0                          | 0                          |
| 450-525       | 448                | 187                | 1108               | 587                | 0                          | 0                          |
| 525-600       | 385                | 107                | 1087               | 518                | 0                          | 0                          |
| 600-inf       | 2863               | 277                | 2910               | 2168               | 9082                       | 5524                       |

**Figure S8.** Example of mRNA colocalization statistics: mRNAs are binned based on Euclidean distance to the closest mRNA of the other species of interest

### Synapse Statistics

We seek to understand how often synapses are being served by mRNA. We assume that mRNAs localizing near a synapse are servicing that synapse. We take advantage of the fact that PSD95 staining for a single synapse looks like a single mRNA spot and detects the position of synapses using FISHquant. When part2.py is run, the program will ask the user to define a colocalization threshold which will be used to determine whether a certain mRNA is localized at a synapse. Then the program loops through every synapse coordinate of each dendrite and counts the number of mRNAs that are within a radius of the threshold distance. We record the number of synapses with X localized mRNA, for X equal to 0, 1, 2, 3, etc. As with the mRNA colocalization functionality, a computation control is required to interpret the statistical significance of the degree of synaptic localization. We generate fake mRNA coordinates and again calculate the number of synapses being served by X fake mRNA.

| Num of mRNA | Real Cy3 | Sim Cy3 | Num of mRNA | Real Cy5 | Sim Cy5 |
|-------------|----------|---------|-------------|----------|---------|
| 0           | 1724     | 2164.61 | 0           | 2148     | 2394    |
| 1           | 525      | 109.73  | 1           | 358      | 140.48  |
| 2           | 150      | 78.5    | 2           | 100      | 60.24   |
| 3           | 32       | 46.14   | 3           | 16       | 23.12   |
| 4           | 5        | 23.15   | 4           | 6        | 7.87    |
| 5           | 1        | 10.21   | 5           | 0        | 2.4     |
| 6           | 1        | 3.84    | 6           | 1        | 0.64    |
| 7           | 0        | 1.39    | 7           | 0        | 0.2     |
| 8           | 0        | 0.32    | 8           | 0        | 0.04    |
| 9           | 0        | 0.1     | 9           | 0        | 0.01    |
| 10          | 0        | 0       |             |          |         |
| 11          | 0        | 0       |             |          |         |
| 12          | 0        | 0.01    |             |          |         |

**Figure S9.** Example of synapse colocalization statistics: synapses are binned based on how many real or simulated mRNAs of interest are within its threshold radius

### Simulation as Control

It is necessary to verify that the observed colocalization patterns (between mRNA and synapses) are due to meaningful biological mechanisms (e.g., active transport of mRNA to a synapse, co-transportation of different mRNA species) rather than restricted space and randomness. To do this, the program picks  $N$  fake mRNA sub-pixel coordinates uniformly random from each print, where  $N$  is the number of real mRNA in that dendrite. The program then uses these fake mRNA coordinates to calculate statistics in the same way it would with real mRNA coordinates. This simulation is repeated 100 times (50 times in the older version of the program), and averages of each statistic are taken. The simulation serves as computation control because if the simulated mRNAs show the same degree of colocalization as the real mRNAs, then colocalization patterns are likely due to having many mRNAs crammed into a restricted space. However, if the real mRNAs show strong colocalization while simulated mRNAs do not, it suggests the existence of an underlying biological mechanism supporting mRNA localization.

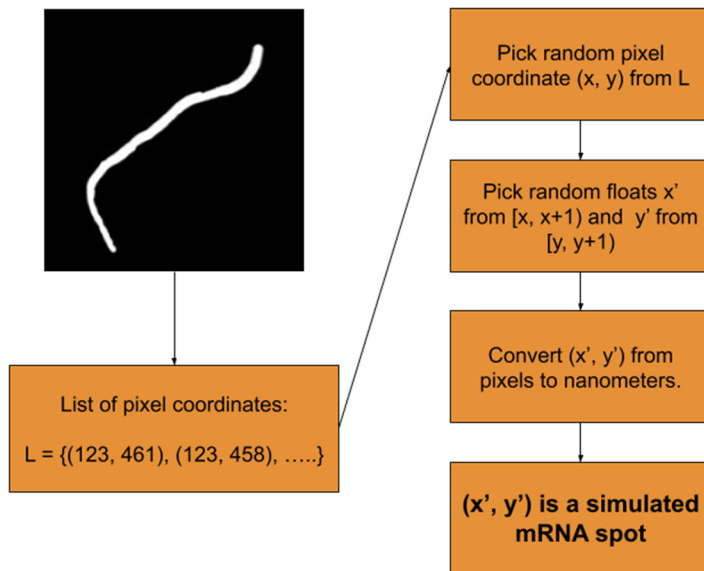

**Figure S10.** Steps used to uniformly randomly sample sub-pixel coordinates from dendrite print to use as simulated mRNA spots

### Writing to Excel Files

The results of all distribution and colocalization analyses are organized into tables and then saved as excel files. The tabular results can then be used to generate plots for visualization and examination.

*Disclaimer: The program layout below is for the newer modularized version of our code. An older version of the code was used to collect the data presented in the paper. Both versions used the same fundamental algorithms, but the older version was organized so that each functionality of part2 was in its own executable script.*

## References

Mueller, F., Senecal, A., Tantale, K. *et al.* FISH-quant: automatic counting of transcripts in 3D FISH images. *Nat Methods* 10, 277–278 (2013). <https://doi.org/10.1038/nmeth.2406>

## XI. Appendix SB. User Manual

### Part 1

#### 1. Setting up your folder of images

We recommend having a specific folder containing all the materials for a specific experiment. Within this experiment folder you should have a subfolder containing all your microscopy images in “.tif” file format.

#### 2. Naming your images

It is important that your images are named properly so that the program can read in all your images.

All images should be names as follows:

***ExperimentName\_(DIV or div)##\_treatment\_listOfStains\_00#(xy or XY)##\_channel.gif***

Where the DIV ## is the age of the neurons. The treatment is the experimental condition. The numbers before and after xy/XY specify the Field of View (FOV), and the channel is the code specifying the microscope channel used for acquiring that Image. You should have one channel for Map2, one for DAPI, a few channels for various mRNAs, and an optional channel for a synaptic stain like PSD95.

Below is an example of the folder setup and image names for a small experiment with DIV 1 and DIV 2, and a treatment called “cta”.

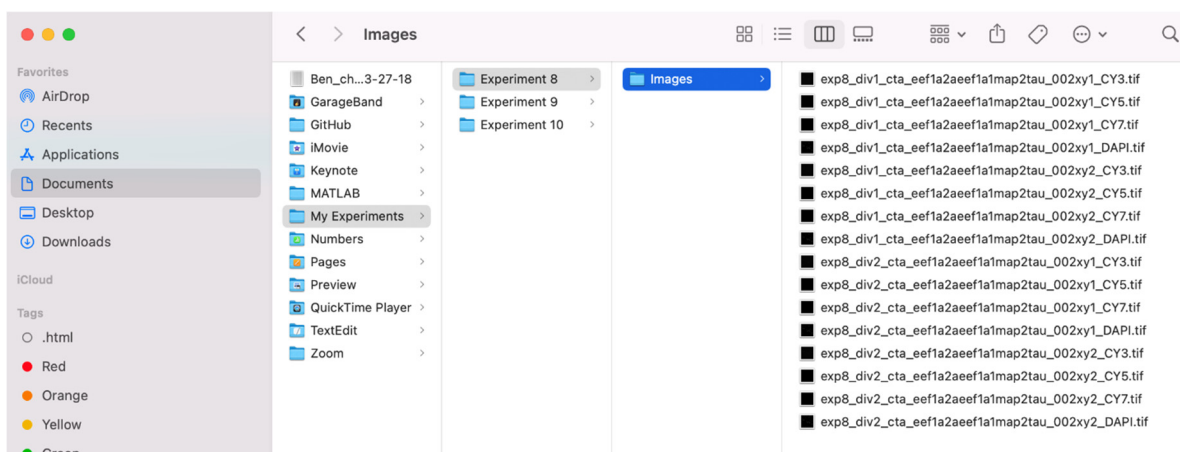

**Note S1:** If you are doing other types of experiments such that you don’t record the DIV number or treatment, you can either add a dummy word there or change the regex expression that the code uses to read images. To do this, alter the regex expression in part1.py and part2.py and change the MaxImg object definition in ui.py.



### 3. Obtaining 2D projections

The first step is to use ImageJ (aka Fiji) to obtain 2D max projections of your “.tif” images. To do this: 1. Open each Image in Fiji and go to Image > Stacks > Z Project. 2. In the pop-up window, make sure the projection type is “Max Intensity”. 3. Save your Image as a gif into your folder of images.

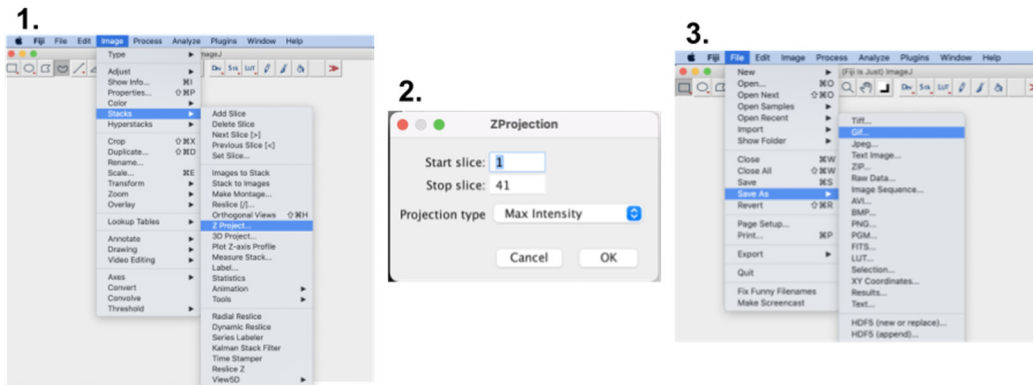

**Note S2:** If you are only analyzing somas and dendrites, you will only need max projections of your Map2 (dendrite stain) images. If you are also analyzing nuclei, you will also need to get max projections of your DAPI (nuclei stain) images.

### 4. Making annotations

To annotate dendrite or somas, open the Map2 max projection .gif in a simple image editing software, for example, Preview on a Mac or Paint on a PC.

Color over up to 9 dendrites or somas of interest **using the following colors in the following order**

1. Red [RBG: (255, 0, 0), hex: #ff0000]
2. Green [RBG: (0, 255, 0), hex: #00ff00]
3. Blue [RBG: (0, 0, 255), hex: #0000ff]
4. Orange [RBG: (240, 134, 51), hex: #f08633]
5. Yellow [RBG: (255, 255, 0), hex: #ffff00]
6. Purple [RBG: (143, 57, 182), hex: #8f39b6]
7. Teal [RBG: (130, 210, 208), hex: #82d2d0]
8. Mint [RBG: (214, 253, 208), hex: #d6fdd0]
9. Salmon [RBG: (255, 128, 102), hex: #ff8066]

You must be sure to use exactly these colors with these RBG values. If you are using Preview, you can change the precise color of your pen by clicking on the color, clicking on “Show colors...” and specifying the Hex code, or sliding the RBG values.

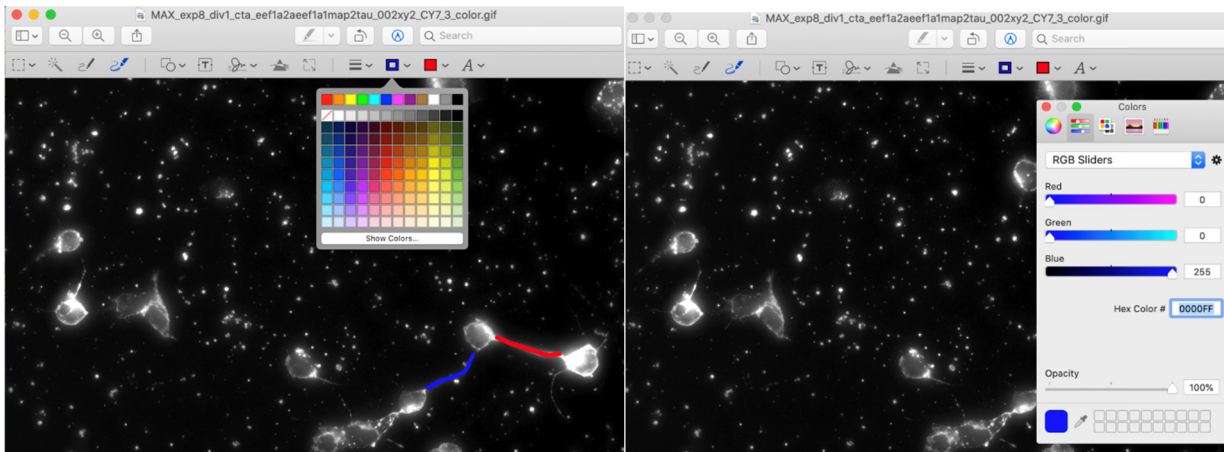

**Note S3:** We have found that sometimes when saving gif images from Paint on PC's, the colors of the annotations can change. This affects the ability of the program to detect the annotations. If you annotate Image on a PC, we recommend that you open images of the annotations you have made and record the RGB values of the color that the annotations were saved as. Then open part1.py and on lines 11-20 edit the RGB values of each color accordingly.

```

9  def main():
10     #####Set colors#####
11     colors = {"red": [255,0,0],
12              "green": [0,255,0],
13              "blue": [0,0,255],
14              "orange": [240, 134, 51],
15              "yellow": [255, 255, 0],
16              "purple": [143, 57, 182],
17              "teal": [130, 210, 204],
18              "mint": [214, 253, 208],
19              "salmon": [255, 128, 102]
20     }

```

#### 4.a If analyzing dendrites:

- Make a copy of each 2D Map2 gif and open it in your Image annotating software
- Color over up to 9 dendrites, using the colors in order as listed above
- Prints for dendrites are generated by extracting the signal behind your annotations, so it is best to cover the dendrites of interest completely
- Save the gif
- Rename the file by adding the tag "dendAnnot\_N" before "gif", where N is the number of dendrites you colored in that Image

#### 4.b If analyzing somas/nuclei:

- Make a copy of each 2D Map2 gif and open it in your Image annotating software
- Color over up to 9 somas, using the colors in order as listed above

- Soma prints are generated by taking the area of the annotations, so it is more critical that soma annotations are accurate and do not extend past the edge of the soma
- Save the gif
- Rename the file by adding the tag “somAnnot\_N” before “gif” where N is the number of somas you colored in that Image

#### 4.c Tips for Annotating

- Try to avoid having your dendritic annotations touch the border of the Image as it can distort the skeleton of dendrites
- Before annotating a soma, open the DAPI max projection to make sure the nucleus for that soma is clearly visible
- Avoid annotating cellular compartments that overlap significantly with other dendrites or somas because FISHQuant will overcount the number of mRNAs in that cellular compartment
- Careful annotations lead to better prints and skeletons

Below is an example of how your 2D max projections and annotations should be named.

```

■ MAX_exp8_div1_cta_eef1a2aeef1a1map2tau_002xy1_CY7_2_dendAnnot.gif
■ MAX_exp8_div1_cta_eef1a2aeef1a1map2tau_002xy1_CY7_3_somAnnot.gif
■ MAX_exp8_div1_cta_eef1a2aeef1a1map2tau_002xy1_CY7.gif
■ MAX_exp8_div1_cta_eef1a2aeef1a1map2tau_002xy1_DAPI.gif
■ MAX_exp8_div1_cta_eef1a2aeef1a1map2tau_002xy2_CY7_1_dendAnnot.gif
■ MAX_exp8_div1_cta_eef1a2aeef1a1map2tau_002xy2_CY7_5_somAnnot.gif
■ MAX_exp8_div1_cta_eef1a2aeef1a1map2tau_002xy2_CY7.gif
■ MAX_exp8_div1_cta_eef1a2aeef1a1map2tau_002xy2_DAPI.gif
■ MAX_exp8_div2_cta_eef1a2aeef1a1map2tau_002xy1_CY7_3_dendAnnot.gif
■ MAX_exp8_div2_cta_eef1a2aeef1a1map2tau_002xy1_CY7_3_somAnnot.gif
■ MAX_exp8_div2_cta_eef1a2aeef1a1map2tau_002xy1_CY7.gif
■ MAX_exp8_div2_cta_eef1a2aeef1a1map2tau_002xy1_DAPI.gif
■ MAX_exp8_div2_cta_eef1a2aeef1a1map2tau_002xy2_CY7_1_dendAnnot.gif
■ MAX_exp8_div2_cta_eef1a2aeef1a1map2tau_002xy2_CY7_6_somAnnot.gif
■ MAX_exp8_div2_cta_eef1a2aeef1a1map2tau_002xy2_CY7.gif
■ MAX_exp8_div2_cta_eef1a2aeef1a1map2tau_002xy2_DAPI.gif

```

#### 5. Now you are ready to run part1.py!

After running part1.py, your folder of images should have a new folder containing the text file outlines for dendrite and somas specific to each mRNA channel. You should also have a folder called **“SkeletonsAndPrints,”** which will contain all the gif images of the skeletons and prints for every annotated compartment.

At this point, your folder of images should look like the following:

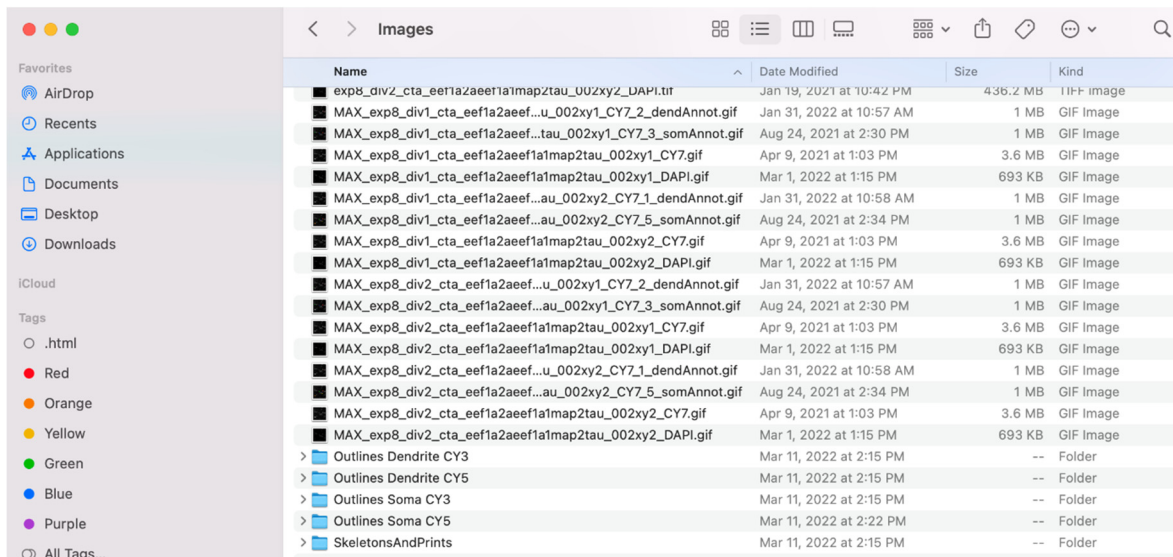

Within the **SkeletonsAndPrints** folder, each print/skeleton for a compartment is labeled with a unique “**segmentation number.**” This segmentation number is recorded as the cell number in the text file outlines. The segmentation number for a soma is the same segmentation number as its corresponding nucleus.

**Note S4:** If an annotation was done with the wrong color, if a soma had no clear nucleus in the DAPI image, or if there was any other technical issue with generating a print for a compartment, the print will not be saved as a gif. In this case, we skip this compartment in the outline text files, and we also skip a segmentation number.

The matching segmentation numbers for a soma and its corresponding nuclei are circled below

- MAX\_exp8\_div2\_cta\_eef1a2aeef1a1map2tau\_002xy1\_CY7\_somaprint\_3.gif
- MAX\_exp8\_div2\_cta\_eef1a2aeef1a1map2tau\_002xy1\_CY7\_nucprint\_3.gif
- MAX\_exp8\_div2\_cta\_eef1a2aeef1a1map2tau\_002xy1\_CY7\_somaprint\_2.gif
- MAX\_exp8\_div2\_cta\_eef1a2aeef1a1map2tau\_002xy1\_CY7\_nucprint\_2.gif
- MAX\_exp8\_div2\_cta\_eef1a2aeef1a1map2tau\_002xy1\_CY7\_somaprint\_1.gif
- MAX\_exp8\_div2\_cta\_eef1a2aeef1a1map2tau\_002xy1\_CY7\_nucprint\_1.gif
- MAX\_exp8\_div2\_cta\_eef1a2aeef1a1map2tau\_002xy1\_CY7\_print\_2.gif
- MAX\_exp8\_div2\_cta\_eef1a2aeef1a1map2tau\_002xy1\_CY7\_skel\_2.gif
- MAX\_exp8\_div2\_cta\_eef1a2aeef1a1map2tau\_002xy1\_CY7\_print\_1.gif
- MAX\_exp8\_div2\_cta\_eef1a2aeef1a1map2tau\_002xy1\_CY7\_skel\_1.gif

Now you should make new folders in your folder of images so that you have a place to save your result files from FISHQuant. You should name your folders “**Results Dendrite/Soma channel**” for each mRNA channel (and synaptic channel) you are using.



Below is an example of how to name your result folders

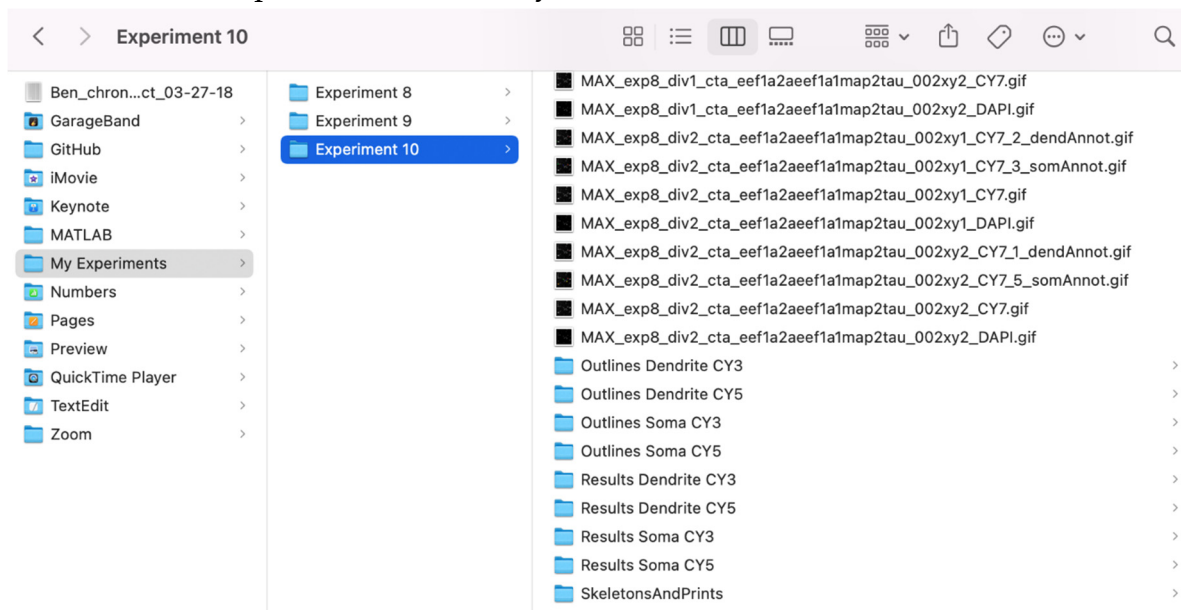

## FISHQuant

**You are now ready to run FISHQuant!**

When you run FISHQuant, you can set the root folders with batch processing. Below is an example of how you would set the root folder for analyzing Dendrites for the CY3 channels...

- Root folder for images: “Images”
- Root folder for outlines: “Outlines Dendrites CY3”
- Root folder for results: “Results Dendrite CY3”

If you would like to do synaptic localization analysis in Part 2, you will need to also use FISHQuant to find the coordinates of every synapse. You can do this by treating your synapse stain the same as you would an mRNA stain.

For more information about using FISHQuant, reference this article (<https://www.nature.com/articles/nmeth.2406>)

## Part 2

When you run part2.py the command prompt will ask you which of the following functionalities you would like to use:

### 1. Density Analysis

- Input: None
- Output: Excel file called SomaDensities.xlsx/DendriteDensities.xlsx
- Statistics: The density of mRNA per square nanometer in each annotated cellular compartment
- Example:

| Number | Channel | Number of mRNA | Area (sq. nanometer) | Density                |
|--------|---------|----------------|----------------------|------------------------|
| 1      | Cy3     | 254            | 14087068.75          | 0.000018030720550008   |
| 1      | Cy5     | 96             | 14087068.75          | 0.00000681476052283766 |
| 2      | Cy3     | 132            | 6309712.5            | 0.0000209201290867056  |
| 2      | Cy5     | 73             | 6309712.5            | 0.0000115694653282539  |
| 3      | Cy3     | 183            | 8956093.75           | 0.0000204330152305518  |
| 3      | Cy5     | 124            | 8956093.75           | 0.0000138453217955652  |
| 4      | Cy3     | 110            | 5639450              | 0.0000195054482263341  |
| 4      | Cy5     | 68             | 5639450              | 0.0000120579134490066  |
| 5      | Cy3     | 348            | 11845156.25          | 0.0000293790974686383  |
| 5      | Cy5     | 184            | 11845156.25          | 0.0000155337756730731  |
| 6      | Cy3     | 242            | 13347468.75          | 0.0000181307785418115  |
| 6      | Cy5     | 92             | 13347468.75          | 0.00000689269266878786 |

## 2. Distribution Analysis

- Input: None
- Output: Excel file called DistrAnalysis.xlsx
- Statistics: The number of mRNA at 0-25, 25-50, 50-75, 75-100, 100-125, 125-150, >150 nm away from the soma for each annotated dendrite. Distances are measured along the skeleton for each dendrite
- Example:

| Dendrite Num | Channel | 0-25 (um) | 25-50 (um) | 50-75 (um) | 75-100 (um) | 100-125 (um) | 125-150 (um) | >= 150 (um) |
|--------------|---------|-----------|------------|------------|-------------|--------------|--------------|-------------|
| 1            | Cy3     | 89        | 35         | 33         | 32          | 35           | 22           | 0           |
| 1            | Cy5     | 47        | 9          | 8          | 13          | 10           | 6            | 0           |
| 2            | Cy3     | 52        | 36         | 42         | 2           | 0            | 0            | 0           |
| 2            | Cy5     | 45        | 16         | 12         | 0           | 0            | 0            | 0           |
| 3            | Cy3     | 67        | 40         | 26         | 48          | 2            | 0            | 0           |
| 3            | Cy5     | 61        | 25         | 13         | 25          | 0            | 0            | 0           |
| 4            | Cy3     | 110       | 0          | 0          | 0           | 0            | 0            | 0           |
| 4            | Cy5     | 68        | 0          | 0          | 0           | 0            | 0            | 0           |
| 5            | Cy3     | 90        | 64         | 68         | 71          | 55           | 0            | 0           |
| 5            | Cy5     | 51        | 40         | 26         | 35          | 32           | 0            | 0           |
| 6            | Cy3     | 74        | 43         | 34         | 30          | 31           | 16           | 0           |
| 6            | Cy5     | 38        | 14         | 13         | 4           | 9            | 3            | 0           |
| 7            | Cy3     | 59        | 36         | 35         | 0           | 0            | 0            | 0           |
| 7            | Cy5     | 52        | 20         | 10         | 0           | 0            | 0            | 0           |
| 8            | Cy3     | 181       | 0          | 0          | 0           | 0            | 0            | 0           |
| 8            | Cy5     | 96        | 0          | 0          | 0           | 0            | 0            | 0           |
| 9            | Cy3     | 101       | 69         | 49         | 30          | 4            | 0            | 0           |
| 9            | Cy5     | 73        | 26         | 12         | 5           | 1            | 0            | 0           |
| 10           | Cy3     | 67        | 59         | 57         | 6           | 0            | 0            | 0           |
| 10           | Cy5     | 56        | 31         | 25         | 4           | 0            | 0            | 0           |

## 3. Colocalization Analysis

- Input: 2 channels of mRNA that are to be analyzed, max recorded distance, desired increment to record distances in the excel table
- Output: Excel file called ColocAnalysis.xlsx
- Statistics: In each dendrite, for each mRNA of type A we record the minimum distance to another mRNA of type B, and for each mRNA of type B we record the minimum distance to an mRNA of type A. This is also done for distance from type A to mRNA themselves and distance from type B mRNA to themselves. These distances are binned based on the desired increment and reported in the excel file. To provide a computational

control, we randomly simulate the coordinates of both type A and type B mRNA 100 times and report the average statistics using these simulated coordinates in the last two columns of the excel file.

- Example:

| Distance (nm) | Cy3 to closest Cy5 | Cy5 to closest Cy3 | Cy3 to closest Cy3 | Cy5 to closest Cy5 | Sim-Cy3 to closest Sim-Cy5 | Sim-Cy5 to closest Sim-Cy3 |
|---------------|--------------------|--------------------|--------------------|--------------------|----------------------------|----------------------------|
| 0-75          | 487                | 489                | 94                 | 109                | 0                          | 0                          |
| 75-150        | 1172               | 1190               | 387                | 359                | 0                          | 0                          |
| 150-225       | 1216               | 1198               | 710                | 550                | 0                          | 0                          |
| 225-300       | 1203               | 1113               | 988                | 671                | 0                          | 0                          |
| 300-375       | 792                | 655                | 1183               | 628                | 0                          | 0                          |
| 375-450       | 516                | 308                | 1191               | 643                | 0                          | 0                          |
| 450-525       | 448                | 187                | 1108               | 587                | 0                          | 0                          |
| 525-600       | 385                | 107                | 1087               | 518                | 0                          | 0                          |
| 600-inf       | 2863               | 277                | 2910               | 2168               | 9082                       | 5524                       |

#### 4. Synapse Localization Analysis

- Input: Name of the synapse channel, threshold distance to consider mRNA localized at a synapse.
- Output: Excel file called SynapseAnalysis.xlsx
- Statistics: For every annotated dendrite and every synapse, we calculate the number of mRNA with the threshold distance to the synapse. We sum over all dendrites and record the number of synapses with X mRNAs localized at them, where X is 1, 2, 3, etc. To provide a computational control, we randomly simulate the coordinates of each type of mRNA 100 times and report the average statistics using these simulated coordinates in the columns titled "Sim mRNA Channel."
- Example:

| Num of mRNA | Real Cy3 | Sim Cy3 | Num of mRNA | Real Cy5 | Sim Cy5 |
|-------------|----------|---------|-------------|----------|---------|
| 0           | 1724     | 2164.61 | 0           | 2148     | 2394    |
| 1           | 525      | 109.73  | 1           | 358      | 140.48  |
| 2           | 150      | 78.5    | 2           | 100      | 60.24   |
| 3           | 32       | 46.14   | 3           | 16       | 23.12   |
| 4           | 5        | 23.15   | 4           | 6        | 7.87    |
| 5           | 1        | 10.21   | 5           | 0        | 2.4     |
| 6           | 1        | 3.84    | 6           | 1        | 0.64    |
| 7           | 0        | 1.39    | 7           | 0        | 0.2     |
| 8           | 0        | 0.32    | 8           | 0        | 0.04    |
| 9           | 0        | 0.1     | 9           | 0        | 0.01    |
| 10          | 0        | 0       |             |          |         |
| 11          | 0        | 0       |             |          |         |
| 12          | 0        | 0.01    |             |          |         |

**Note S6:** Part 2 will calculate the localization statistics separately for dendrites/somas of different DIV #s and treatments. Each excel file will have a sheet for each DIV treatment combination used in the experiment.
